# Supplementary material
Source: PubMed Central journal article supplement (PMC6233771)

## Supplementary Online Content

Hauschild A, Larkin J, Ribas A, et al. Prognostic Subgroups for Survival and Treatment Outcomes in *BRAF* V600–Mutated Metastatic Melanoma: Pooled Analysis of 4 Randomized Clinical Trials. *JAMA Oncol*. Published online August 2, 2018. doi:10.1001/jamaoncol.2018.2668

|                                                                                                                                                                                                     |    |
|-----------------------------------------------------------------------------------------------------------------------------------------------------------------------------------------------------|----|
| eTable 1. Genes Included in the Cell Cycle and Immune Gene Expression Signature ...                                                                                                                 | 2  |
| eTable 2. Baseline Characteristics .....                                                                                                                                                            | 3  |
| eTable 3. Baseline Characteristics in Patients With Available Gene Expression Signature Data .....                                                                                                  | 4  |
| eTable 4. Distribution of Gene Expression Signatures by Prognostic Subgroups Identified for PFS in All Pooled Patients With Gene Expression Data (n = 608) .....                                    | 5  |
| eTable 5. Distribution of Gene Expression Signatures by Prognostic Subgroups Identified for OS in All Pooled Patients With Gene Expression Data (n = 608) .....                                     | 6  |
| eTable 6. Objective Response Rate by Prognostic Subgroups Identified for PFS and OS in All Pooled Patients Across Treatment Cohorts.....                                                            | 7  |
| eTable 7. Duration of Response by Prognostic Subgroups Identified for PFS and OS in All Pooled Patients Across Treatment Cohorts .....                                                              | 8  |
| eFigure 1. PFS by Prognostic Subgroup Identified by the Recursive Partitioning Model in All Pooled Patients .....                                                                                   | 9  |
| eFigure 2. Recursive Partitioning Decision Tree and OS Outcomes by Identified Prognostic Subgroups in All Pooled Patients.....                                                                      | 12 |
| eFigure 3. OS by Prognostic Subgroup Identified in the Recursive Partitioning Model in All Pooled Patients .....                                                                                    | 13 |
| eFigure 4. Recursive Partitioning Decision Tree and PFS Outcomes by Identified Prognostic Subgroups in All Patients With Gene Expression Data.....                                                  | 16 |
| eFigure 5. Recursive Partitioning Decision Tree and Outcomes by Identified Prognostic Subgroups for OS in All Patients With Gene Expression Data.....                                               | 17 |
| eFigure 6. Prevalence of Immune or Cell Cycle Gene Expression Signatures by Prognostic Subgroups For PFS (Panel A) and OS (Panel B) in all Pooled Patients With Gene Expression Data (n = 608)..... | 18 |
| eFigure 7. Objective Response by Prognostic Subgroups. ....                                                                                                                                         | 20 |

This supplementary material has been provided by the authors to give readers additional information about their work.

**eTable 1. Genes Included in the Cell Cycle and Immune Gene Expression Signature**

| <b>Cell cycle genes</b> | <b>Immune signature genes</b> |
|-------------------------|-------------------------------|
| <i>BRCA1</i>            | <i>CCL5</i>                   |
| <i>BRIP1</i>            | <i>CCND2</i>                  |
| <i>CCNB1</i>            | <i>CCR5</i>                   |
| <i>CCNE1</i>            | <i>CD247</i>                  |
| <i>FH</i>               | <i>CD3E</i>                   |
| <i>KDM4A</i>            | <i>CD4</i>                    |
| <i>MAP2K2</i>           | <i>CD86</i>                   |
| <i>MTCH1</i>            | <i>CD8A</i>                   |
| <i>MYC</i>              | <i>GZMA</i>                   |
| <i>NF2</i>              | <i>HAVCR2</i>                 |
| <i>PRKDC</i>            | <i>IKZF1</i>                  |
| <i>PTK2</i>             | <i>KIR3DL1</i>                |
| <i>RPTOR</i>            | <i>KLRK1</i>                  |
| <i>SMARCA4</i>          | <i>LAG3</i>                   |
| <i>SNAI2</i>            | <i>LGALS9</i>                 |
| <i>SOX4</i>             | <i>MYD88</i>                  |
| <i>SRSF2</i>            | <i>PDCD1LG2</i>               |
| <i>WDR5</i>             | <i>PIK3R5</i>                 |
| <i>ZNF703</i>           | <i>PTGER4</i>                 |
|                         | <i>PTPRC</i>                  |
|                         | <i>TBX21</i>                  |
|                         | <i>TIGIT</i>                  |
|                         | <i>TNFRSF9</i>                |

**eTable 2. Baseline Characteristics<sup>a</sup>**

| Characteristic                 | All Pooled Patients (n = 1365) | Cobimetinib Plus Vemurafenib (n = 310) | Vemurafenib Monotherapy (n = 717) | Dacarbazine (n = 338) |
|--------------------------------|--------------------------------|----------------------------------------|-----------------------------------|-----------------------|
| Age                            |                                |                                        |                                   |                       |
| <65 y                          | 1032 (75.6)                    | 232 (74.8)                             | 530 (73.9)                        | 270 (79.9)            |
| ≥65 y                          | 333 (24.4)                     | 78 (25.2)                              | 187 (26.1)                        | 68 (20.1)             |
| Sex                            |                                |                                        |                                   |                       |
| Male                           | 783 (57.4)                     | 181 (58.4)                             | 421 (58.7)                        | 181 (53.6)            |
| Female                         | 582 (42.6)                     | 129 (41.6)                             | 296 (41.3)                        | 157 (46.4)            |
| Race                           |                                |                                        |                                   |                       |
| White                          | 1325 (97.1)                    | 298 (93.2)                             | 698 (97.4)                        | 338 (100.0)           |
| Nonwhite                       | 40 (2.9)                       | 21 (6.8)                               | 19 (2.6)                          | 0                     |
| Region                         |                                |                                        |                                   |                       |
| North America                  | 389 (28.5)                     | 76 (24.5)                              | 227 (31.7)                        | 86 (25.4)             |
| Europe                         | 774 (56.7)                     | 182 (58.7)                             | 389 (54.3)                        | 203 (60.1)            |
| Australia/New Zealand/Others   | 202 (14.8)                     | 52 (16.8)                              | 101 (14.1)                        | 49 (14.5)             |
| Baseline disease stage         | n = 1364                       | n = 310                                | n = 716                           | n = 338               |
| Unresectable IIIC, M1a, or M1b | 500 (36.7)                     | 120 (38.7)                             | 262 (36.6)                        | 118 (34.9)            |
| M1c                            | 864 (63.3)                     | 190 (61.3)                             | 454 (63.4)                        | 220 (65.1)            |
| Baseline ECOG PS               | n = 1359                       | n = 306                                | n = 715                           | n = 338               |
| 0                              | 911 (67.0)                     | 225 (73.5)                             | 456 (63.8)                        | 230 (68.0)            |
| 1                              | 447 (32.9)                     | 80 (26.1)                              | 259 (36.2)                        | 108 (32.0)            |
| 2                              | 1 (0.1)                        | 1 (0.3)                                | 0                                 | 0                     |
| Baseline LDH                   | n = 1237                       | n = 285                                | n = 671                           | n = 281               |
| Normal                         | 690 (55.8)                     | 155 (54.4)                             | 375 (55.9)                        | 160 (56.9)            |
| Elevated ≤2x ULN               | 361 (29.2)                     | 95 (33.3)                              | 183 (27.3)                        | 83 (29.5)             |
| Elevated >2x ULN               | 186 (15.0)                     | 35 (12.3)                              | 113 (16.8)                        | 38 (13.5)             |
| Baseline liver metastasis      | n = 1357                       | n = 310                                | n = 713                           | n = 334               |
| Yes                            | 447 (32.9)                     | 100 (32.3)                             | 236 (33.1)                        | 111 (33.2)            |
| No                             | 910 (67.1)                     | 210 (67.7)                             | 477 (66.9)                        | 223 (66.8)            |
| Baseline SLD of target lesions | n = 1347                       | n = 310                                | n = 704                           | n = 333               |
| Mean (SD)                      | 81.7 (70.4)                    | 74.4 (57.8)                            | 86.1 (80.1)                       | 79.2 (57.3)           |
| Median (range)                 | 65.0 (9-1310)                  | 62.5 (10-398)                          | 68.0 (9-1310)                     | 66.0 (9-295)          |
| Gene expression signature      | n = 608                        | n = 143                                | n = 320                           | n = 145               |
| Cell cycle                     | 312 (51.3)                     | 71 (49.7)                              | 172 (53.8)                        | 69 (47.6)             |
| Immune                         | 296 (48.7)                     | 72 (50.3)                              | 148 (46.3)                        | 76 (52.4)             |

Abbreviations: ECOG PS, Eastern Cooperative Oncology Group performance status; LDH, lactate dehydrogenase; SD, standard deviation; SLD, sum of longest diameter; ULN, upper limit of normal.

<sup>a</sup> Data are presented as number (percentage) of patients unless otherwise indicated.

**eTable 3. Baseline Characteristics in Patients With Available Gene Expression Signature Data<sup>a</sup>**

|                                | <b>All Pooled Patients<br/>(n = 608)</b> | <b>Cobimetinib Plus Vemurafenib<br/>(n = 143)</b> | <b>Vemurafenib<br/>(n = 320)</b> | <b>Dacarbazine<br/>(n = 145)</b> |
|--------------------------------|------------------------------------------|---------------------------------------------------|----------------------------------|----------------------------------|
| Baseline ECOG PS               | n = 606                                  | n = 143                                           | n = 318                          | n = 145                          |
| 0                              | 406 (67.0)                               | 109 (76.2)                                        | 202 (63.5)                       | 95 (65.5)                        |
| 1                              | 200 (33.0)                               | 34 (23.8)                                         | 116 (36.5)                       | 50 (34.5)                        |
| 2                              | 0                                        | 0                                                 | 0                                | 0                                |
| Baseline LDH                   | n = 565                                  | n = 132                                           | n = 300                          | n = 133                          |
| Normal                         | 307 (54.3)                               | 68 (51.5)                                         | 165 (55.0)                       | 74 (55.6)                        |
| Elevated (≤2× ULN)             | 169 (29.9)                               | 43 (32.6)                                         | 84 (28.0)                        | 42 (31.6)                        |
| Elevated (>2× ULN)             | 89 (15.8)                                | 21 (15.9)                                         | 51 (17.0)                        | 17 (12.8)                        |
| Baseline liver metastasis      | n = 606                                  | n = 143                                           | n = 318                          | n = 145                          |
| Yes                            | 202 (33.3)                               | 51 (35.7)                                         | 106 (33.3)                       | 45 (31.0)                        |
| No                             | 404 (66.7)                               | 92 (64.3)                                         | 212 (66.7)                       | 100 (69.0)                       |
| Baseline SLD of target lesions | n = 604                                  | n = 143                                           | n = 316                          | n = 145                          |
| Median, mm (range)             | 69.7 (9-511)                             | 65.0 (10-332)                                     | 70.5 (9-511)                     | 71.0 (10-295)                    |
| Gene expression signature      | n = 608                                  | n = 143                                           | n = 320                          | n = 145                          |
| Cell cycle                     | 312 (51.3)                               | 71 (49.7)                                         | 172 (53.8)                       | 69 (47.6)                        |
| Immune                         | 296 (48.7)                               | 72 (50.3)                                         | 148 (46.3)                       | 76 (52.4)                        |

Abbreviations: ECOG PS, Eastern Cooperative Oncology Group performance status; LDH, lactate dehydrogenase; SLD, sum of longest diameters; ULN, upper limit of normal.

<sup>a</sup> Data are presented as number (percentage) of patients unless otherwise indicated.

**eTable 4. Distribution of Gene Expression Signatures by Prognostic Subgroups Identified for PFS in All Pooled Patients With Gene Expression Data (n = 608)**

| Genomic signature, n (%)    | LDH Normal and LM Absent | LDH Normal and LM Present | LDH Elevated $\leq 2 \times$ ULN, ECOG PS 0, and SLD $\leq 44$ mm | LDH Elevated $\leq 2 \times$ ULN, ECOG PS 0, and SLD $> 44$ mm | LDH Elevated $\leq 2 \times$ ULN and ECOG PS $\geq 1$ | LDH Elevated $> 2 \times$ ULN |
|-----------------------------|--------------------------|---------------------------|-------------------------------------------------------------------|----------------------------------------------------------------|-------------------------------------------------------|-------------------------------|
| All pooled patients         | n = 225                  | n = 81                    | n = 23                                                            | n = 81                                                         | n = 65                                                | n = 89                        |
| Cell cycle                  | 93 (41.3)                | 40 (49.4)                 | 13 (56.5)                                                         | 43 (53.1)                                                      | 44 (67.7)                                             | 58 (65.2)                     |
| Immune                      | 132 (58.7)               | 41 (50.6)                 | 10 (43.5)                                                         | 38 (46.9)                                                      | 21 (32.3)                                             | 31 (34.8)                     |
| <i>P</i> value <sup>a</sup> | <.0001                   |                           |                                                                   |                                                                |                                                       |                               |
| Cobimetinib + vemurafenib   | n = 48                   | n = 20                    | n = 7                                                             | n = 23                                                         | n = 13                                                | n = 21                        |
| Cell cycle                  | 20 (41.7)                | 8 (40.0)                  | 2 (28.6)                                                          | 12 (52.2)                                                      | 10 (76.9)                                             | 13 (61.9)                     |
| Immune                      | 28 (58.3)                | 12 (60.0)                 | 5 (71.4)                                                          | 11 (47.8)                                                      | 3 (23.1)                                              | 8 (38.1)                      |
| <i>P</i> value <sup>a</sup> | .0062                    |                           |                                                                   |                                                                |                                                       |                               |
| Vemurafenib                 | n = 116                  | n = 48                    | n = 14                                                            | n = 34                                                         | n = 36                                                | n = 51                        |
| Cell cycle                  | 44 (37.9)                | 28 (58.3)                 | 9 (64.3)                                                          | 18 (52.9)                                                      | 25 (69.4)                                             | 36 (70.6)                     |
| Immune                      | 72 (62.1)                | 20 (41.7)                 | 5 (35.7)                                                          | 16 (47.1)                                                      | 11 (30.6)                                             | 15 (29.4)                     |
| <i>P</i> value <sup>a</sup> | <.0001                   |                           |                                                                   |                                                                |                                                       |                               |
| Dacarbazine                 | n = 61                   | n = 13                    | n = 2                                                             | n = 24                                                         | n = 16                                                | n = 17                        |
| Cell cycle                  | 29 (47.5)                | 4 (30.8)                  | 2 (100.0)                                                         | 13 (54.2)                                                      | 9 (56.3)                                              | 9 (52.9)                      |
| Immune                      | 32 (52.5)                | 9 (69.2)                  | 0                                                                 | 11 (45.8)                                                      | 7 (43.8)                                              | 8 (47.1)                      |
| <i>P</i> value <sup>a</sup> | .3146                    |                           |                                                                   |                                                                |                                                       |                               |

Abbreviations: ECOG PS, Eastern Cooperative Oncology Group performance status; LDH, lactate dehydrogenase; LM, liver metastases; PFS, progression-free survival; ULN, upper limit of normal.

<sup>a</sup>One-sided Cochrane-Armitage trend test.

**eTable 5. Distribution of Gene Expression Signatures by Prognostic Subgroups Identified for OS in All Pooled Patients With Gene Expression Data (n = 608)**

| Genomic signature, n (%)    | LDH Normal and SLD ≤45 mm | LDH Normal and SLD >45 mm | LDH Elevated ≤2x ULN and ECOG PS 0 | LDH Elevated ≤2x ULN and ECOG PS ≥1 | LDH Elevated >2x ULN |
|-----------------------------|---------------------------|---------------------------|------------------------------------|-------------------------------------|----------------------|
| All pooled patients         | n = 140                   | n = 165                   | n = 104                            | n = 65                              | n = 89               |
| Cell cycle                  | 54 (38.6)                 | 78 (47.3)                 | 56 (53.8)                          | 44 (67.7)                           | 58 (65.2)            |
| Immune                      | 86 (61.4)                 | 87 (52.7)                 | 48 (46.2)                          | 21 (32.3)                           | 31 (34.8)            |
| <i>P</i> value <sup>a</sup> | <.0001                    |                           |                                    |                                     |                      |
| Cobimetinib + vemurafenib   | n = 29                    | n = 39                    | n = 30                             | n = 13                              | n = 21               |
| Cell cycle                  | 10 (34.5)                 | 18 (46.2)                 | 14 (46.7)                          | 10 (76.9)                           | 13 (61.9)            |
| Immune                      | 19 (65.5)                 | 21 (53.8)                 | 16 (53.3)                          | 3 (23.1)                            | 8 (38.1)             |
| <i>P</i> value <sup>a</sup> | .0078                     |                           |                                    |                                     |                      |
| Vemurafenib                 | n = 73                    | n = 90                    | n = 48                             | n = 36                              | n = 51               |
| Cell cycle                  | 29 (39.7)                 | 42 (46.7)                 | 27 (56.3)                          | 25 (69.4)                           | 36 (70.6)            |
| Immune                      | 44 (60.3)                 | 48 (53.3)                 | 21 (43.8)                          | 11 (30.6)                           | 15 (29.4)            |
| <i>P</i> value <sup>a</sup> | <.0001                    |                           |                                    |                                     |                      |
| Dacarbazine                 | n = 38                    | n = 36                    | n = 26                             | n = 16                              | n = 17               |
| Cell cycle                  | 15 (39.5)                 | 18 (50.0)                 | 15 (57.7)                          | 9 (56.3)                            | 9 (52.9)             |
| Immune                      | 23 (60.5)                 | 18 (50.0)                 | 11 (42.3)                          | 7 (43.8)                            | 8 (47.1)             |
| <i>P</i> value <sup>a</sup> | .1051                     |                           |                                    |                                     |                      |

Abbreviations: ECOG PS, Eastern Cooperative Oncology Group performance status; LDH, lactate dehydrogenase; LM, liver metastases; OS, overall survival; ULN, upper limit of normal.

<sup>a</sup>One-sided Cochrane-Armitage trend test.

**eTable 6. Objective Response Rate by Prognostic Subgroups Identified for PFS and OS in All Pooled Patients Across Treatment Cohorts**

|                                                                   | Objective response rate, n/N (%) |                |               |
|-------------------------------------------------------------------|----------------------------------|----------------|---------------|
|                                                                   | Cobimetinib Plus Vemurafenib     | Vemurafenib    | Dacarbazine   |
| <b>PFS Prognostic Subgroup</b>                                    |                                  |                |               |
| LDH normal and LM absent                                          | 91/118 (77.1)                    | 177/276 (64.1) | 25/124 (20.2) |
| LDH normal and LM present                                         | 27/37 (73.0)                     | 60/96 (62.5)   | 3/36 (8.3)    |
| LDH elevated $\leq 2 \times$ ULN, ECOG PS 0, and SLD $\leq 44$ mm | 18/23 (78.3)                     | 16/27 (59.3)   | 2/9 (22.2)    |
| LDH elevated $\leq 2 \times$ ULN, ECOG PS 0, and SLD $> 44$ mm    | 35/48 (72.9)                     | 34/71 (47.9)   | 4/41 (9.8)    |
| LDH elevated $\leq 2 \times$ ULN and ECOG PS $\geq 1$             | 16/24 (66.7)                     | 39/85 (45.9)   | 3/33 (9.1)    |
| LDH elevated $> 2 \times$ ULN                                     | 19/35 (54.3)                     | 37/113 (32.7)  | 1/38 (2.6)    |
| <b>OS Prognostic Subgroup</b>                                     |                                  |                |               |
| LDH normal and SLD $\leq 45$ mm                                   | 55/73 (75.3)                     | 114/171 (66.7) | 18/79 (22.8)  |
| LDH normal and SLD $> 45$ mm                                      | 63/82 (76.8)                     | 123/193 (63.7) | 10/81 (12.3)  |
| LDH elevated $\leq 2 \times$ ULN and ECOG PS 0                    | 53/71 (74.6)                     | 50/98 (51.0)   | 6/50 (12.0)   |
| LDH elevated $\leq 2 \times$ ULN and ECOG PS $\geq 1$             | 16/24 (66.7)                     | 39/85 (45.9)   | 3/33 (9.1)    |
| LDH elevated $> 2 \times$ ULN                                     | 19/35 (54.3)                     | 37/113 (32.7)  | 1/38 (2.6)    |

Abbreviations: ECOG PS, Eastern Cooperative Oncology Group performance status; LDH, lactate dehydrogenase; LM, liver metastases; OS, overall survival; PFS, progression-free survival; SLD, sum of longest diameters of target lesions; ULN, upper limit of normal.

**eTable 7. Duration of Response by Prognostic Subgroups Identified for PFS and OS in All Pooled Patients Across Treatment Cohorts**

|                                                                  | Duration of response, months, median (95% CI) |                |                 |
|------------------------------------------------------------------|-----------------------------------------------|----------------|-----------------|
|                                                                  | Cobimetinib Plus Vemurafenib                  | Vemurafenib    | Dacarbazine     |
| <b>PFS Prognostic Subgroup</b>                                   |                                               |                |                 |
| LDH normal and LM absent                                         | 18.2 (13.4-26.6)                              | 9.7 (8.3-12.9) | 20.2 (5.0-35.7) |
| LDH normal and LM present                                        | 15.2 (11.1-28.2)                              | 6.3 (5.6-9.0)  | 6.4 (4.3-15.6)  |
| LDH elevated $\leq 2\times$ ULN, ECOG PS 0, and SLD $\leq 44$ mm | NE (16.6-NE)                                  | 11.9 (5.6-NE)  | 7.0 (3.1-10.8)  |
| LDH elevated $\leq 2\times$ ULN, ECOG PS 0, and SLD $>44$ mm     | 12.7 (8.4-17.0)                               | 7.6 (5.6-12.7) | 4.8 (3.8-NE)    |
| LDH elevated $\leq 2\times$ ULN and ECOG PS $\geq 1$             | 9.2 (6.0-16.9)                                | 5.1 (3.7-6.7)  | 7.9 (2.3-20.2)  |
| LDH elevated $>2\times$ ULN                                      | 7.9 (5.1-12.5)                                | 4.0 (3.5-4.5)  | 6.1 (NE-NE)     |
| <b>OS Prognostic Subgroup</b>                                    |                                               |                |                 |
| LDH normal and SLD $\leq 45$ mm                                  | 23.1 (13.6-33.2)                              | 9.2 (8.3-12.9) | 20.2 (4.7-35.7) |
| LDH normal and SLD $>45$ mm                                      | 14.7 (11.1-22.1)                              | 7.6 (6.5-11.6) | 11.0 (4.9-NE)   |
| LDH elevated $\leq 2\times$ ULN and ECOG PS 0                    | 13.5 (12.4-20.4)                              | 8.4 (5.7-13.4) | 4.8 (3.8-10.8)  |
| LDH elevated $\leq 2\times$ ULN and ECOG PS $\geq 1$             | 9.2 (6.0-16.9)                                | 5.1 (3.7-6.7)  | 7.9 (2.3-20.2)  |
| LDH elevated $>2\times$ ULN                                      | 7.9 (5.1-12.5)                                | 4.0 (3.5-4.5)  | 6.1 (NE-NE)     |

Abbreviations: ECOG PS, Eastern Cooperative Oncology Group performance status; LDH, lactate dehydrogenase; LM, liver metastases; NE, not estimable; OS, overall survival; PFS, progression-free survival; SLD, sum of longest diameters of target lesions; ULN, upper limit of normal.



**eFigure 1. PFS by Prognostic Subgroup Identified by the Recursive Partitioning Model in All Pooled Patients**

**A, Pooled vemurafenib cohort. B, Pooled cobimetinib plus vemurafenib cohort. C, Dacarbazine cohort.**  
 ECOG PS, Eastern Cooperative Oncology Group performance status; LDH, lactate dehydrogenase; LM, liver metastases; NE, not estimable; PFS, progression-free survival; SLD, sum of longest diameters of target lesions; ULN, upper limit of normal.

**A**

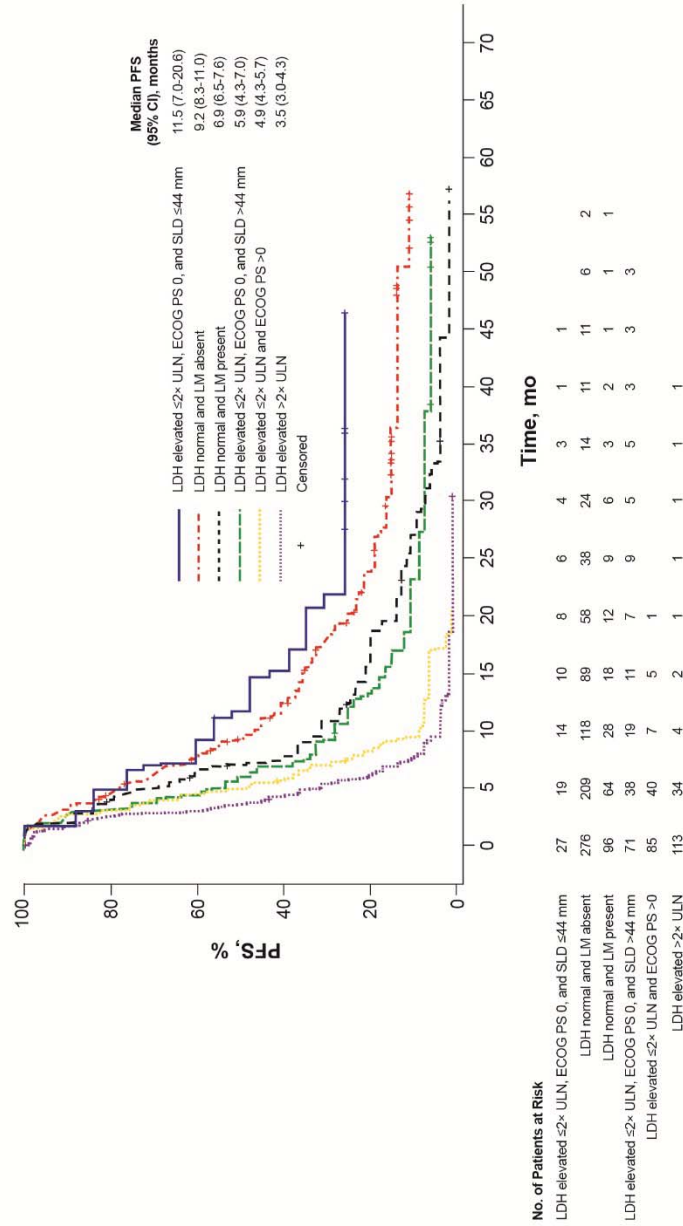

**B**

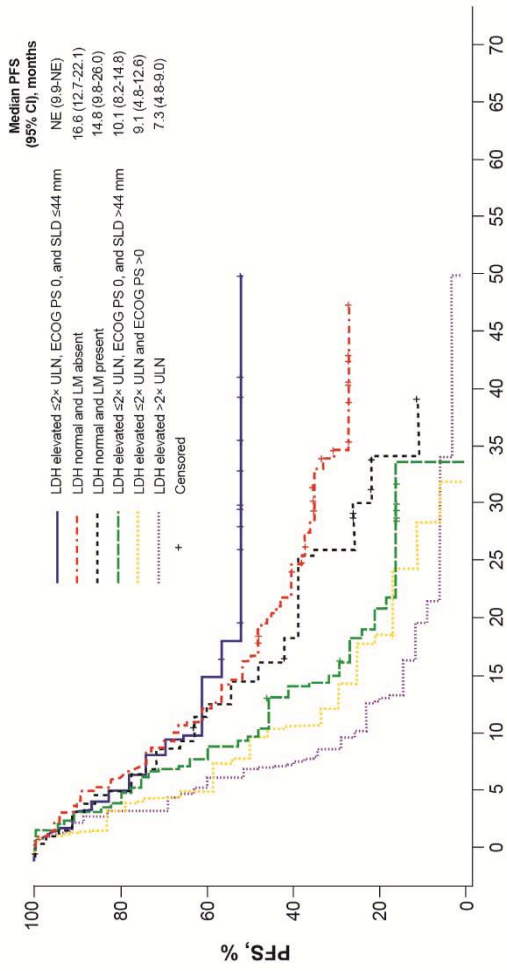

**No. of Patients at Risk**

| Time, mo                                                          | 0   | 5  | 10 | 15 | 20 | 25 | 30 | 35 | 40 | 45 | 50 | 55 | 60 | 65 | 70 |
|-------------------------------------------------------------------|-----|----|----|----|----|----|----|----|----|----|----|----|----|----|----|
| LDH elevated $\geq 2 \times$ ULN, ECOG PS 0, and SLD $\leq 44$ mm | 23  | 19 | 15 | 14 | 10 | 10 | 5  | 4  | 2  | 1  |    |    |    |    |    |
| LDH normal and LM absent                                          | 118 | 99 | 73 | 56 | 48 | 37 | 29 | 8  | 6  | 1  |    |    |    |    |    |
| LDH normal and LM present                                         | 37  | 30 | 22 | 16 | 12 | 12 | 5  | 1  |    |    |    |    |    |    |    |
| LDH elevated $\geq 2 \times$ ULN, ECOG PS 0, and SLD $> 44$ mm    | 48  | 36 | 22 | 13 | 8  | 6  | 2  |    |    |    |    |    |    |    |    |
| LDH elevated $\geq 2 \times$ ULN and ECOG PS $> 0$                | 24  | 16 | 12 | 6  | 3  | 2  | 1  |    |    |    |    |    |    |    |    |
| LDH elevated $> 2 \times$ ULN                                     | 35  | 23 | 9  | 5  | 3  | 2  | 2  | 1  | 1  | 1  |    |    |    |    |    |

C

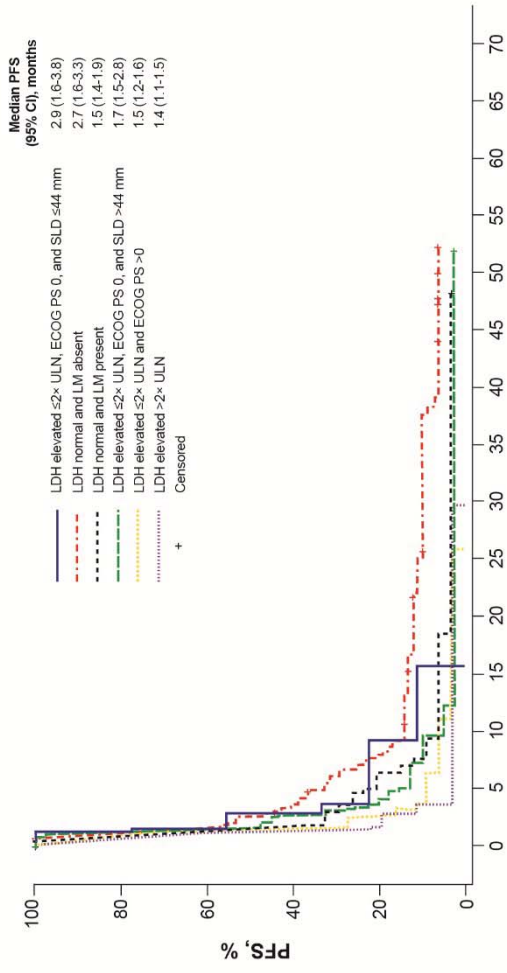

| No. of Patients at Risk                                           | 0   | 5  | 10 | 15 | 20 | 25 | 30 | 35 | 40 | 45 | 50 | 55 | 60 | 65 | 70 |
|-------------------------------------------------------------------|-----|----|----|----|----|----|----|----|----|----|----|----|----|----|----|
| LDH elevated $\leq 2 \times$ ULN, ECOG PS 0, and SLD $\leq 44$ mm | 9   | 2  | 1  | 1  |    |    |    |    |    |    |    |    |    |    |    |
| LDH normal and LM absent                                          | 124 | 39 | 16 | 14 | 12 | 10 | 8  | 8  | 5  | 4  | 1  |    |    |    |    |
| LDH normal and LM present                                         | 36  | 8  | 2  | 2  | 1  | 1  | 1  | 1  | 1  | 1  | 1  |    |    |    |    |
| LDH elevated $\leq 2 \times$ ULN, ECOG PS 0, and SLD $> 44$ mm    | 41  | 7  | 2  | 1  | 1  | 1  | 1  | 1  | 1  | 1  | 1  |    |    |    |    |
| LDH elevated $\leq 2 \times$ ULN and ECOG PS $> 0$                | 33  | 3  | 2  | 1  | 1  | 1  | 1  |    |    |    |    |    |    |    |    |
| LDH elevated $> 2 \times$ ULN                                     | 38  | 1  | 1  | 1  | 1  | 1  | 1  |    |    |    |    |    |    |    |    |

**eFigure 2. Recursive Partitioning Decision Tree and OS Outcomes by Identified Prognostic Subgroups in all pooled patients.** A total of 139 (10.2%) were excluded from the OS analysis.

ECOG PS, Eastern Cooperative Oncology Group performance status; LDH, lactate dehydrogenase; NE, not estimable; SLD, sum of longest diameter; ULN, upper limit of normal.

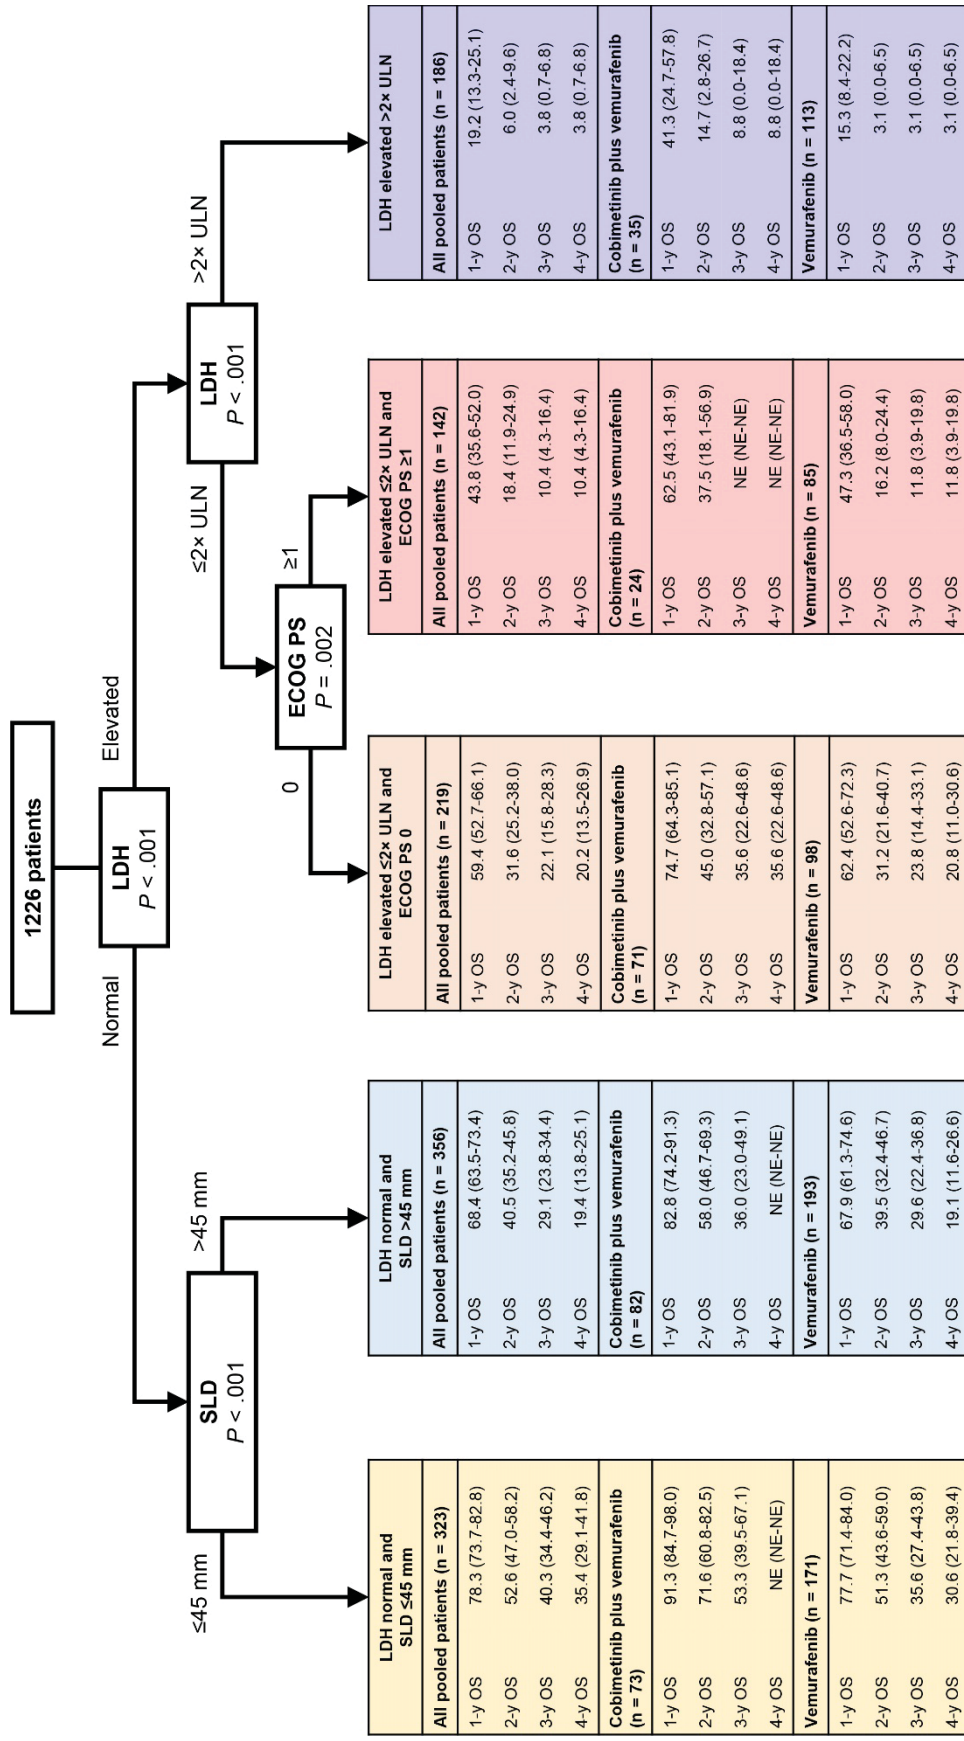

**eFigure 3. OS by Prognostic Subgroup Identified in the Recursive Partitioning Model in all Pooled Patients.**

A, Pooled vemurafenib cohort. B, Pooled cobimetinib plus vemurafenib cohort. C, Dacarbazine cohort.

ECOG PS, Eastern Cooperative Oncology Group performance status; LDH, lactate dehydrogenase; NE, not estimable; OS, overall survival; SLD, sum of longest diameters of target lesions; ULN, upper limit of normal.

**A**

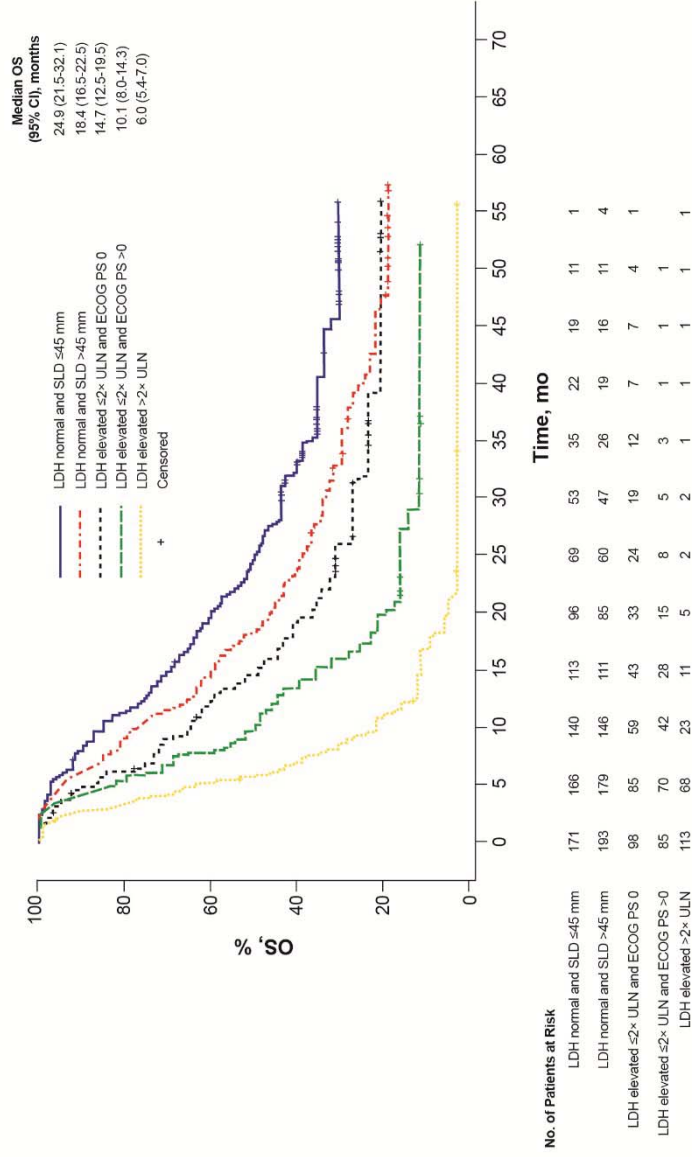

**B**

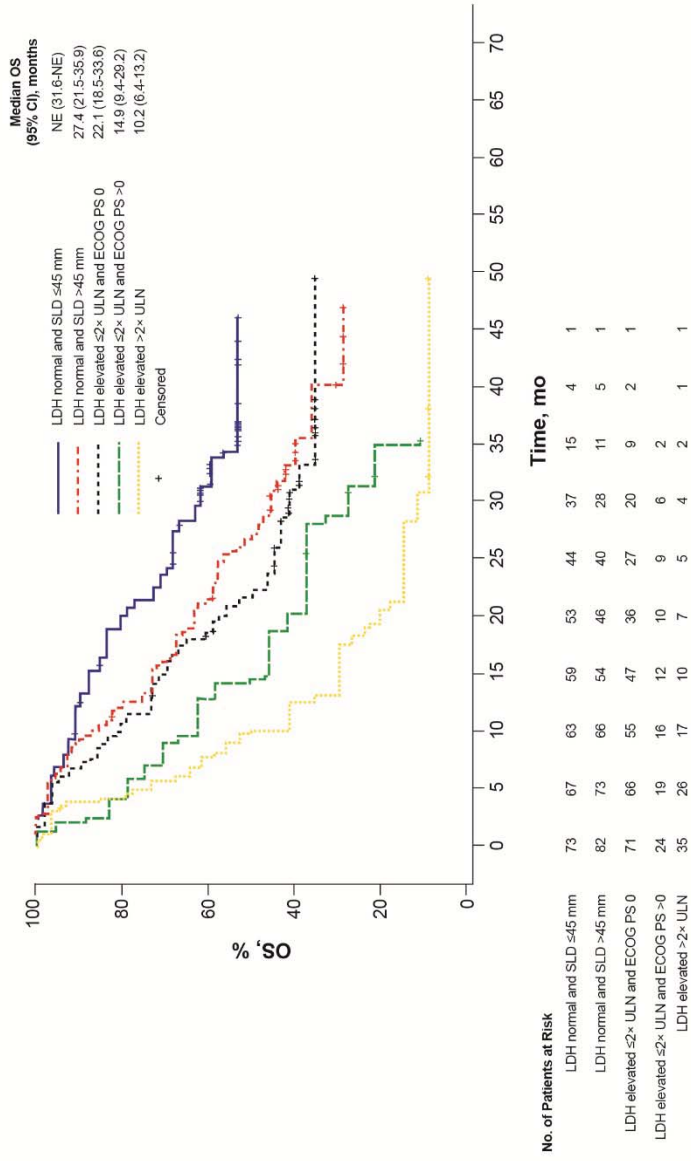

C

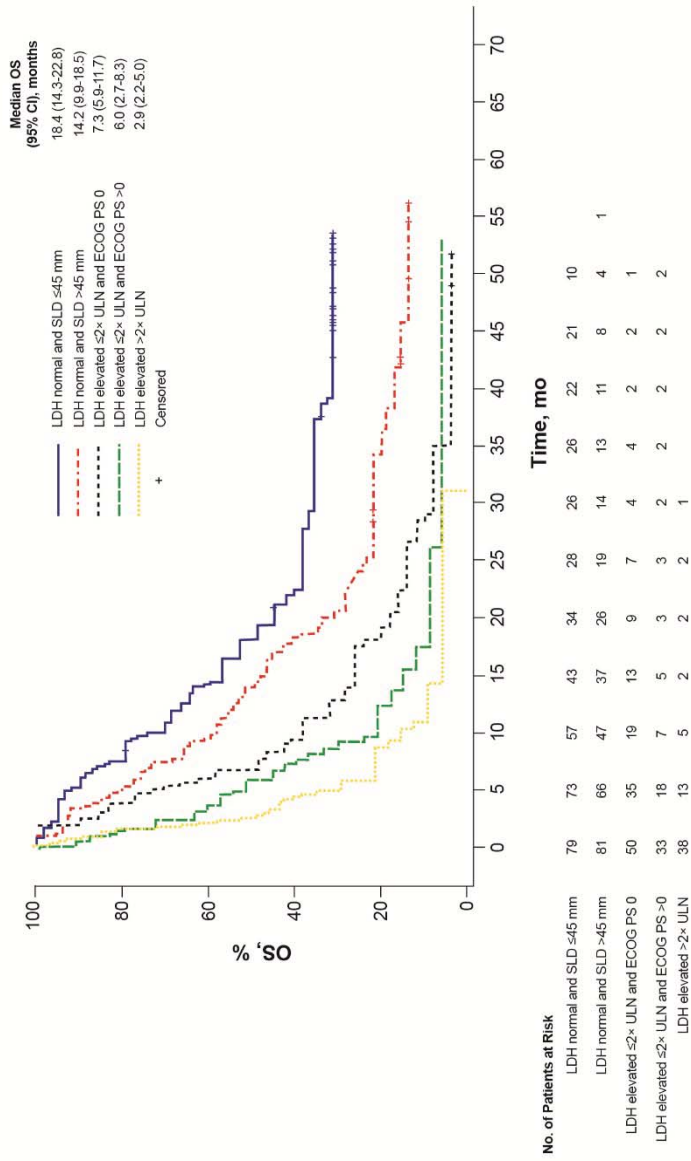

**Figure 4. Recursive Partitioning Decision Tree and PFS Outcomes by Identified Prognostic Subgroups in all patients with gene expression data.** Patients with missing data for one or more parameters of interest were excluded from these analyses. A total of 44 (7.2%) patients were excluded from the gene signature analyses.

ECOG PS, Eastern Cooperative Oncology Group performance status; LDH, lactate dehydrogenase; NE, not estimable; SLD, sum of longest diameter; ULN, upper limit of normal.

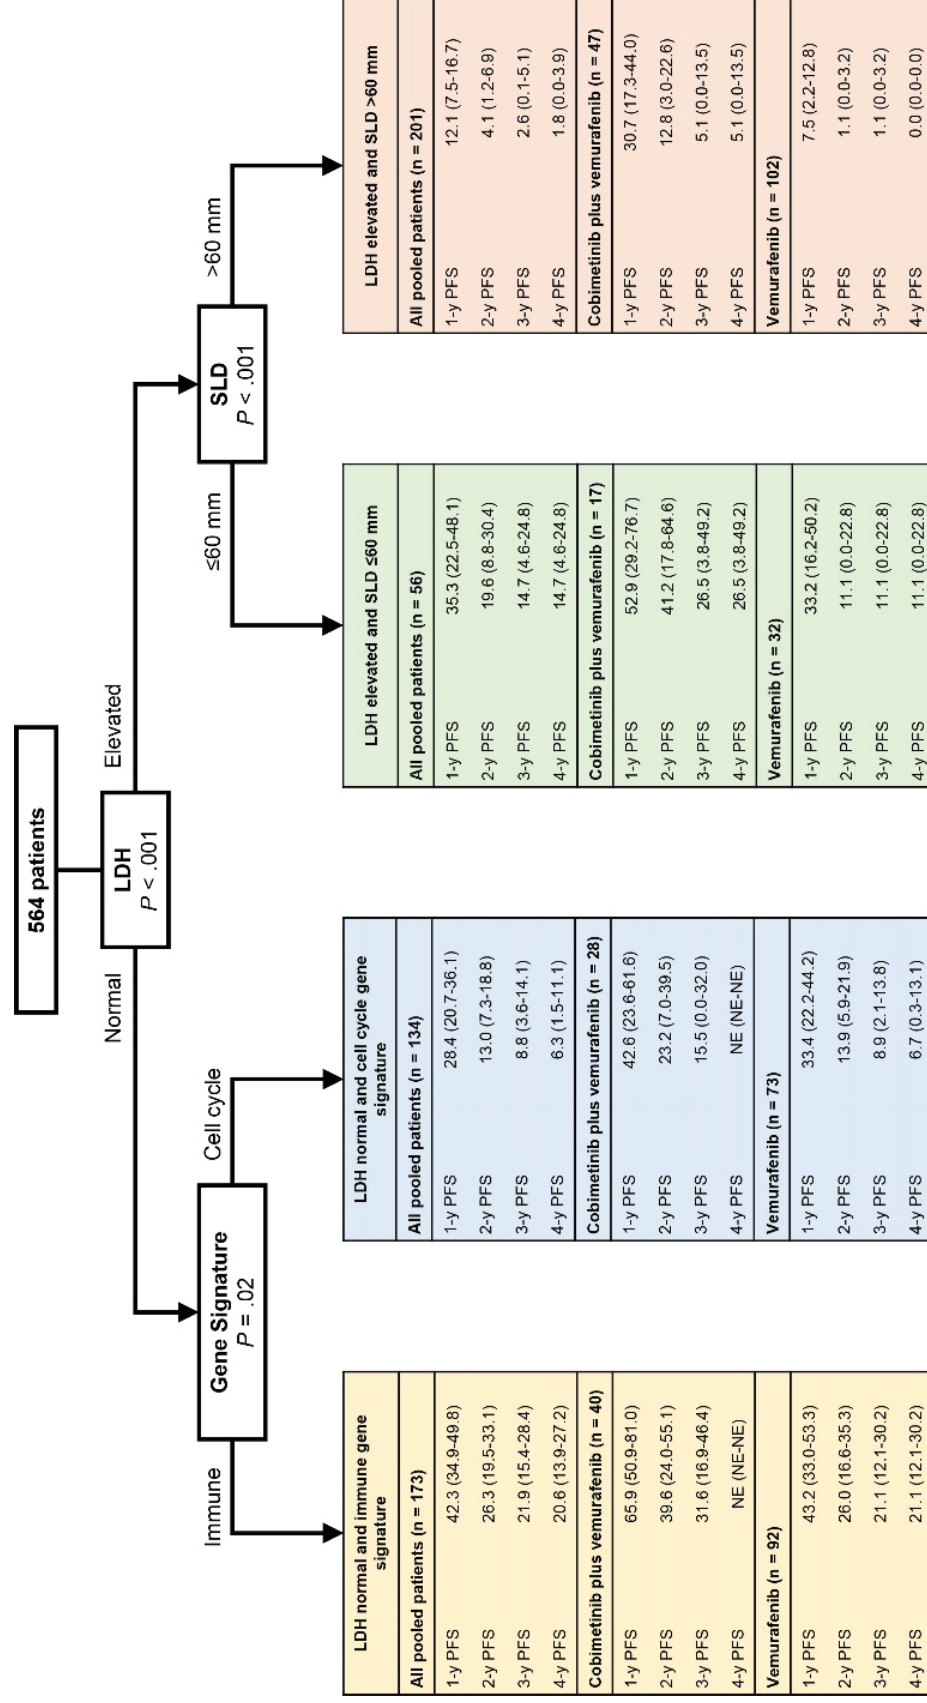



**Figure 5. Recursive Partitioning Decision Tree and Outcomes by Identified Prognostic Subgroups for OS in All Patients With Gene Expression Data.** Patients with missing data for one or more parameters of interest were excluded from these analyses. A total of 44 (7.2%) patients were excluded from the gene signature analyses. Data are % (95% CI). ECOG PS, Eastern Cooperative Oncology Group performance status; LDH, lactate dehydrogenase; LM, liver metastases; ULN, upper limit of normal.

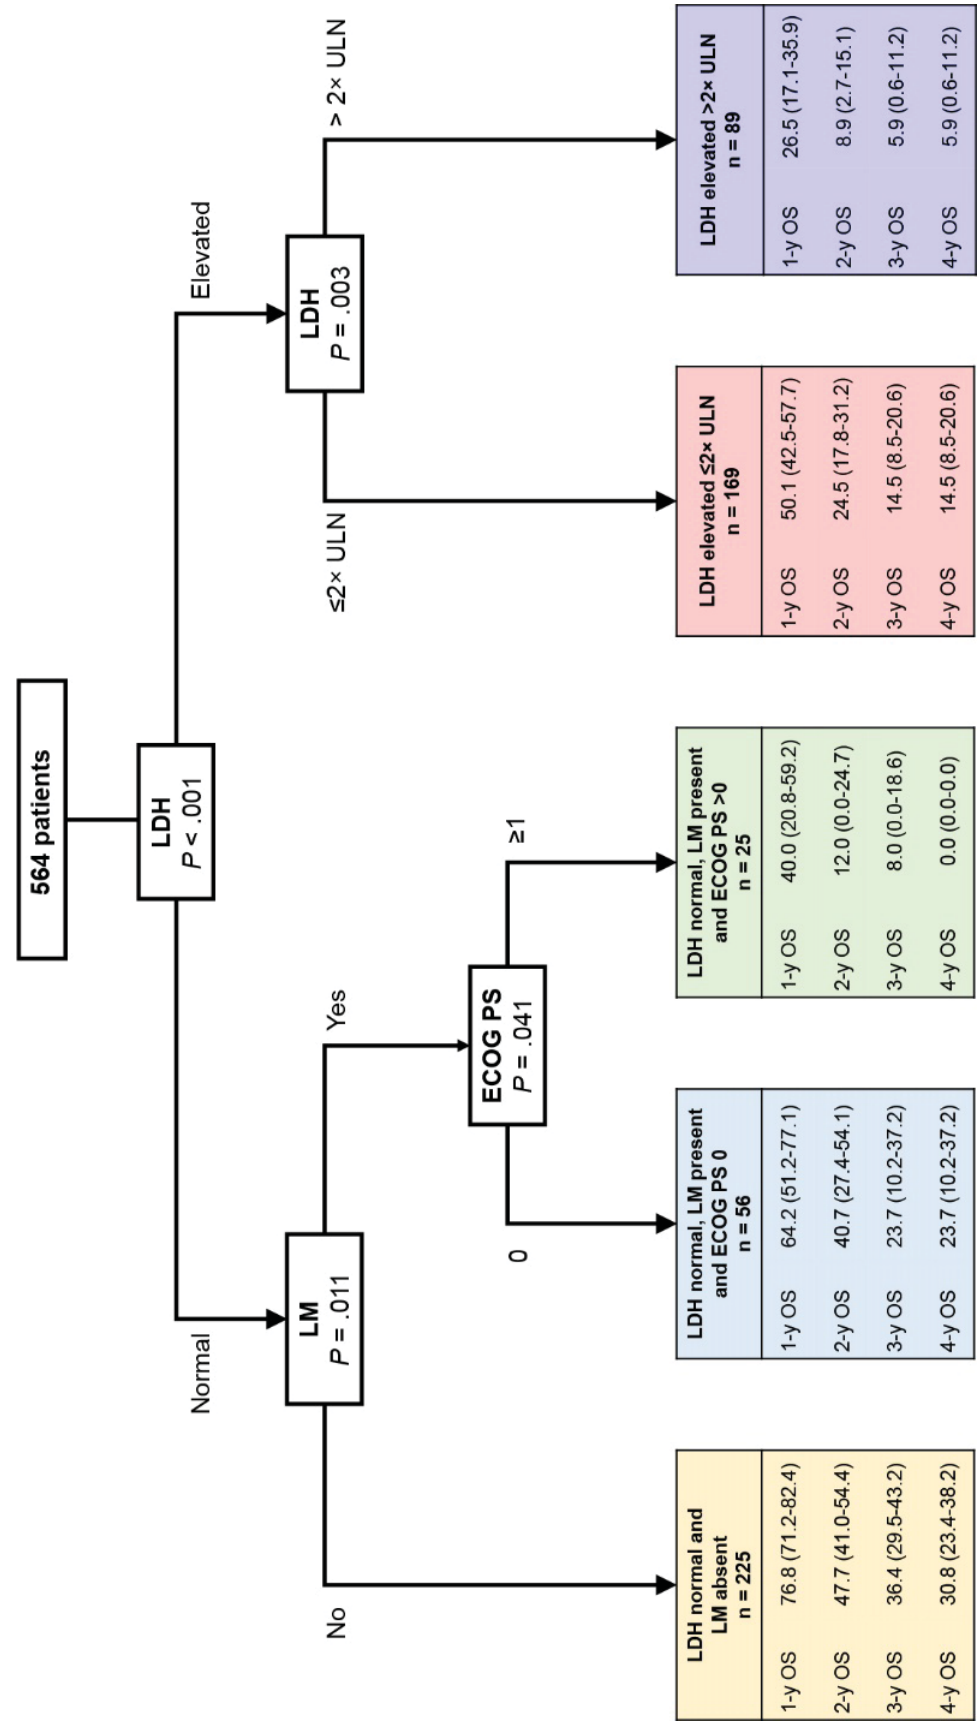

**eFigure 6. Prevalence of Immune or Cell Cycle Gene Expression Signatures by Prognostic Subgroups For PFS (Panel A) and OS (Panel B) in all Pooled Patients With Gene Expression Data (n = 608).**  
 a One-sided Cochrane-Armitage trend test.

ECOG PS, Eastern Cooperative Oncology Group performance status; LDH, lactate dehydrogenase; LM, liver metastases; OS, overall survival; PFS, progression-free survival; SLD, sum of longest diameters of target lesions; ULN, upper limit of normal.

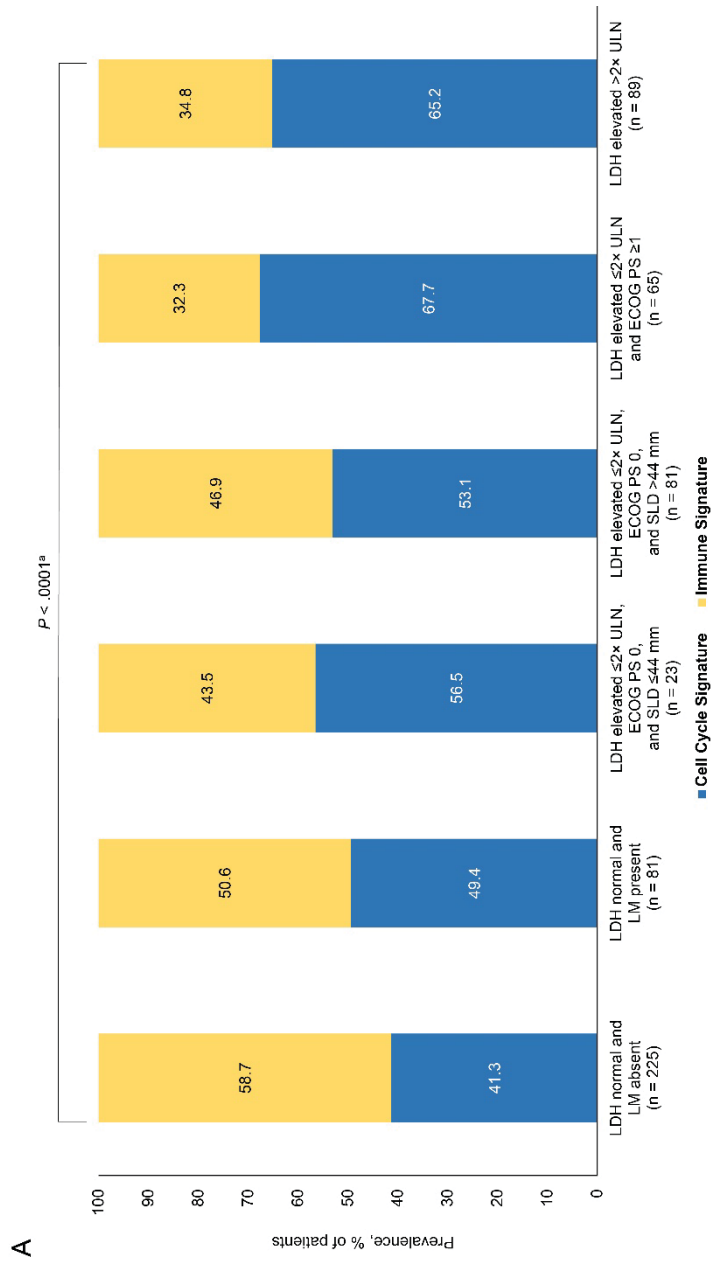

B

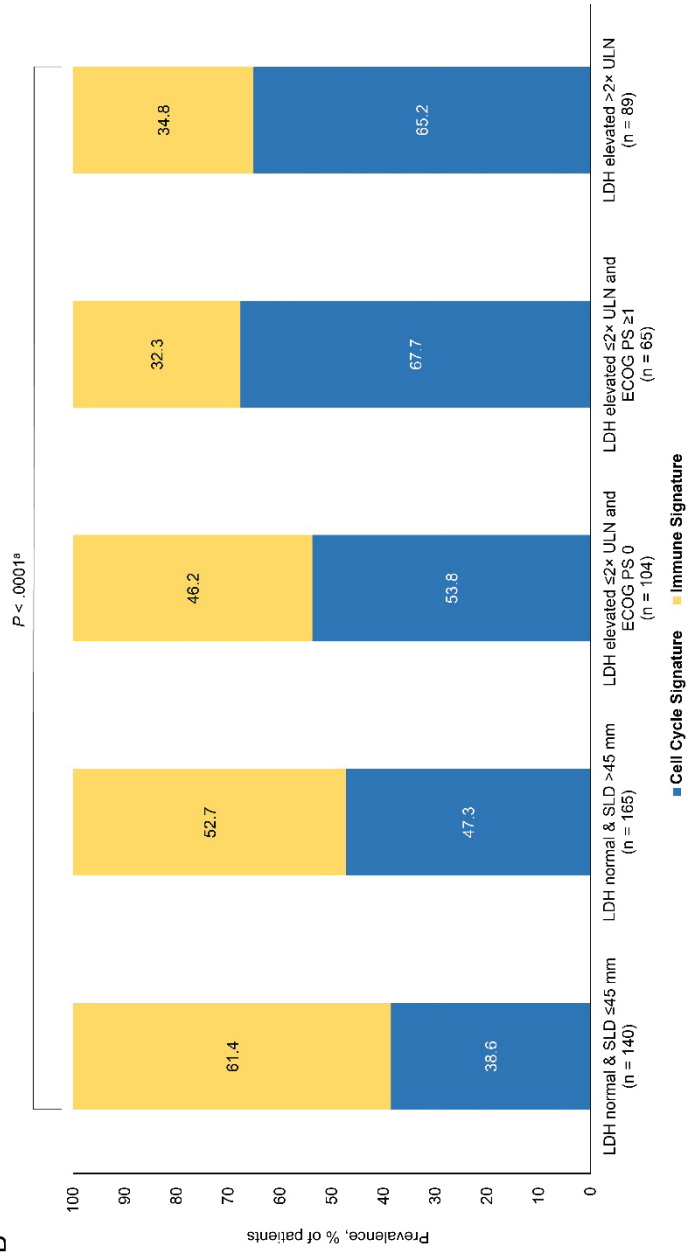

### eFigure 7. Objective Response by Prognostic Subgroups.

**A, Progression-free survival (PFS) and B, overall survival (OS) in all pooled patients across treatment cohorts.**  
 C+V, cobimetinib combined with vemurafenib; CR, complete response; DTIC, dacarbazine; ECOG PS, Eastern Cooperative Oncology Group performance status; LDH, lactate dehydrogenase; LM, liver metastases; OS, overall survival; PFS, progression-free survival; PD, progressive disease; PR, partial response; SD, stable disease; SLD, sum of longest diameters of target lesions; ULN, upper limit of normal; V, vemurafenib.

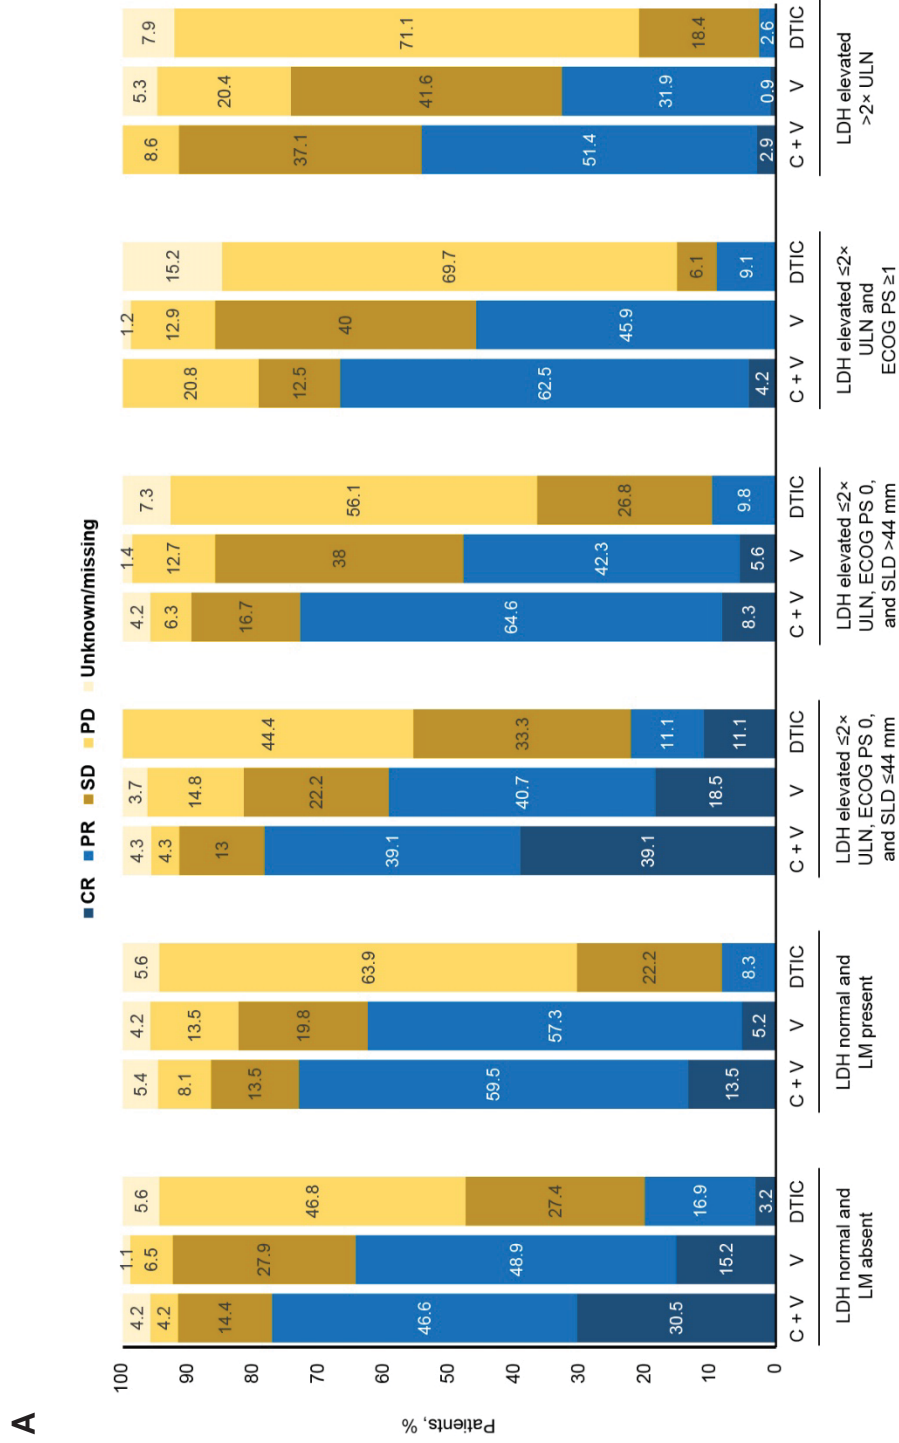

**B**

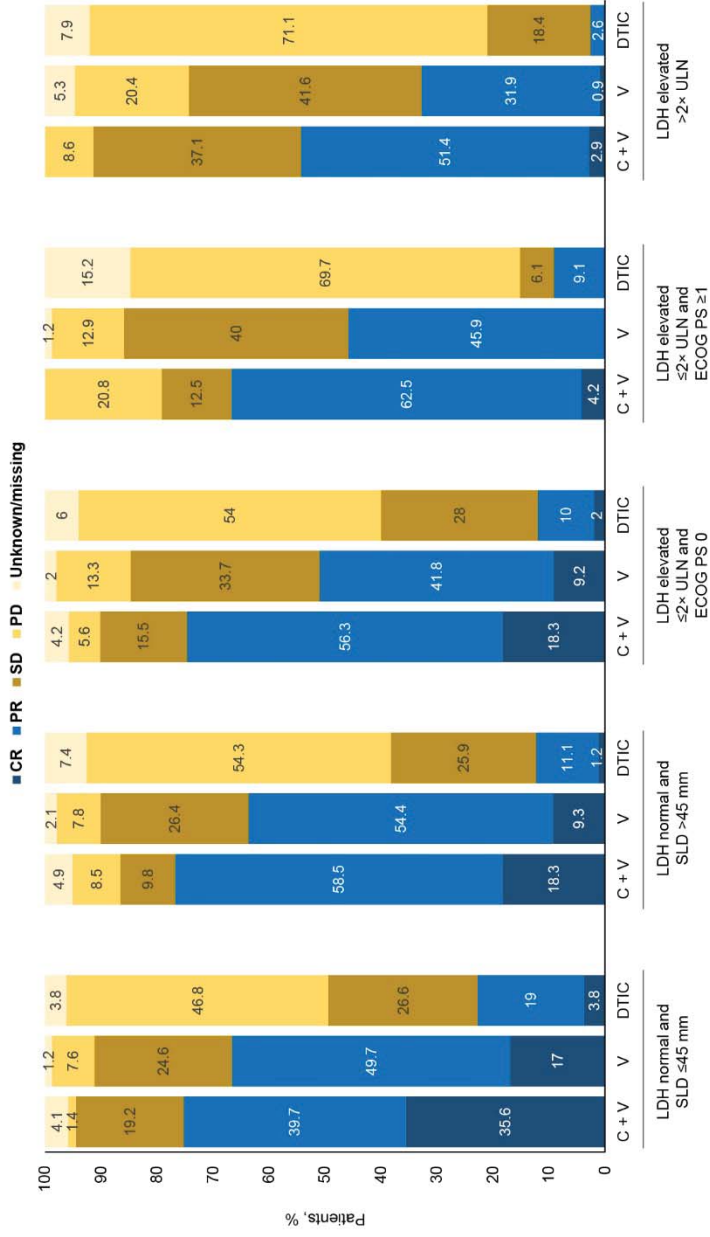

Supplement: jamaoncol-4-1382-s001.pdf [file jamaoncol-4-1382-s001.pdf]
